# Supplementary material for: Cylindrical chains of water drops condensing on microstructured lubricant-infused surfaces
Source: Royal Society of Chemistry journal article supplement (doi:10.1039/c6sm01883a), 2016-01-01
Supplement: c6sm01883a1.pdf [file c6sm01883a1.pdf]

## Supplemental movie and figures

Movie S1: Movie of the condensing water drops on a prism-patterned lubricant infused surface

$S_{III}$ .

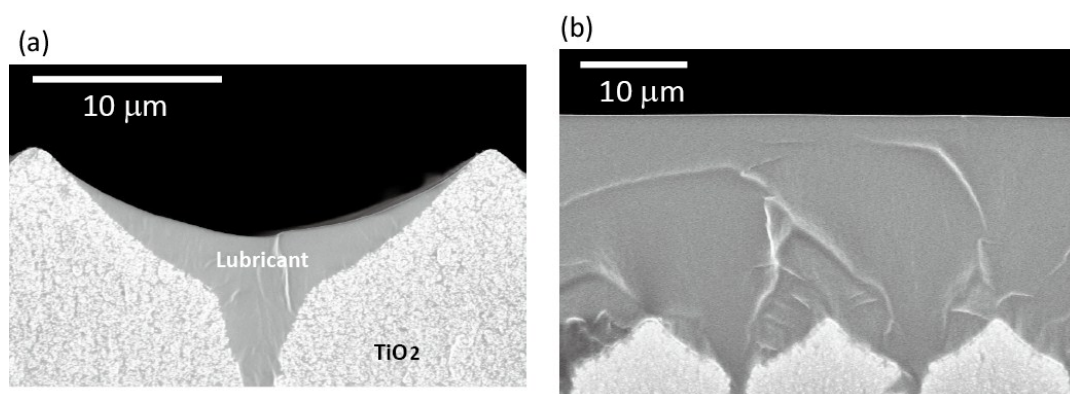

Fig. S2: SEM image of TiO<sub>2</sub> surfaces infused with silicone oil as lubricant. (a) Plot of the thickness of lubricant layer. The lubricant is too thin to cover the top of the prism structure. (b)  $S_V$ : Blade coated with 50 μm spacers. The prism structure is totally covered by a thick layer of the lubricant.

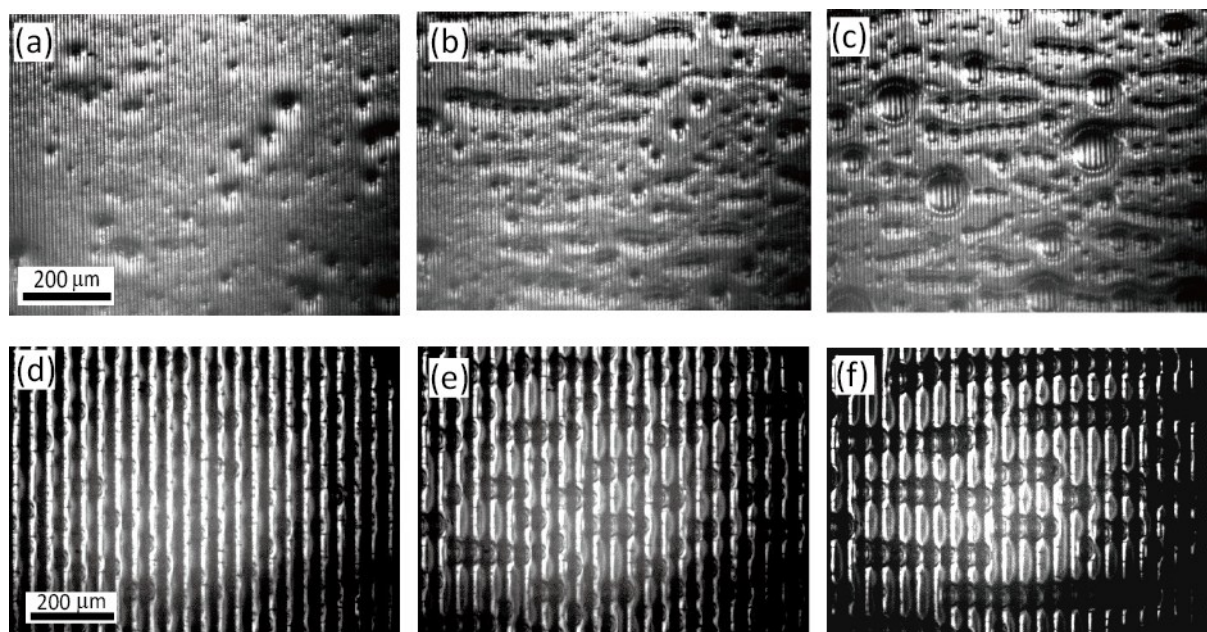

Fig. S3: Condensed drops on lubricant-infused prism arrays with different peak-to-peak distances: (a)-(c) 10  $\mu\text{m}$  and (d) – (f) 50  $\mu\text{m}$ . The silicone oil was spin-coated at 5000 rpm on both surfaces. Images were acquired after (a) 40 s, (b) 80 s, (c) 120 s and (d) 100 s, (e) 250 s (c) 400 s.
